# Supplementary material for: Observational Gait Assessment Scales in Patients with Walking Disorders: Systematic Review
Source: Biomed Res Int. 2019 Oct 31;2019:2085039. doi: 10.1155/2019/2085039 (PMC6875351; doi:10.1155/2019/2085039)
Supplement: 10.1371/journal.pmed100009 Supplementary Materials — Search strategies: it is a table which contains the complete search strategies applied to each electronic database, including the filter selected in PubMed database, as well as a simplification of each strategy. PRISMA statement checklist: it contains the checklist published by Moher et al. (Moher D, Liberati A, Tetzlaff J, Altman DG, The PRISMA Group (2009). Preferred Reporting Items for Systematic Reviews and Meta-Analyses: The PRISMA Statement. PLoS Med 6(7): e1000097. doi: 10.1371/journal.pmed100009), which addresses several conceptual and practical advances in the science of systematic reviews. [file 2085039.f1.docx]

**Search Strategies**

| **Database** | **Search strategy** | **Simplified strategy** |
| --- | --- | --- |
| Pubmed | (gait or walking or locomotion or *ambulation) and (scale or score or questionnaire or test or criter* or assess* or analysis or examination or measure* or outcome) and (observational or visual). *Validation studies*a | 1 and 2 and 4 and 5 |
| (“gait scale” or “gait score” or “gait questionnaire” or “walking scale” or “walking score” or “walking questionnaire” or “locomotion scale” or “locomotion score” or “locomotion questionnaire” or “gait test” or “walking test” or “locomotion test”). *Validation studies*a | 3 and 5 |
| Scopus | (gait or walking or locomotion or *ambulation) and (scale or score or questionnaire or test or criter* or assess* or measure* or examination or analysis or outcome) and (observational or visual) and (valid* or reliability) | 1 and 2 and 4 and 5 |
| (“gait scale” or “walking scale” or “locomotion scale” or “gait score” or “walking score” or “locomotion score” or gait questionnaire” or “walking questionnaire” or locomotion questionnaire” or “gait test” or “walking test” or “locomotion test”) and (valid* or reliability) | 3 and 5 |
| Cochrane | (gait or walking or locomotion or ambulation or deambulation) and (scale or score or questionnaire or test or criter* or assess* or measure* or examination or analysis or outcome) and (observational or visual) and (valid* or reliability) | 1 and 2 and 4 and 5 |
| (“gait scale” or “walking scale” or “locomotion scale” or “gait score” or “walking score” or “locomotion score” or gait questionnaire” or “walking questionnaire” or locomotion questionnaire” or “gait test” or “walking test” or “locomotion test”) and (valid* or reliability) | 3 and 5 |
| Pedro | gait and scale and valid* | 1 and 2 and 5 |
| gait and scale and reliability | 1 and 2 and 5 |
| gait and score and valid* | 1 and 2 and 5 |
| gait and score and reliability | 1 and 2 and 5 |
| gait and questionnaire and reliability | 1 and 2 and 5 |
| gait and questionnaire and valid* | 1 and 2 and 5 |
| WOS | (gait or walking or locomotion or ambulation or deambulation) and (scale or score or questionnaire or test or criter* or assess* or measure* or examination or analysis or outcome) and (observational or visual) and (valid* or reliability) | 1 and 2 and 4 and 5 |
| (“gait scale” or “walking scale” or “locomotion scale” or “gait score” or “walking score” or “locomotion score” or gait questionnaire” or “walking questionnaire” or locomotion questionnaire” or “gait test” or “walking test” or “locomotion test”) and (valid* or reliability) | 3 and 5 |
| Cinahl | (gait or walking or locomotion or *ambulation) and (scale or score or questionnaire or test or criter* or assess* or measure* or examination or analysis or outcome) and (observational or visual) and (valid* or reliability) | 1 and 2 and 4 and 5 |
| (“gait scale” or “walking scale” or “locomotion scale” or “gait score” or “walking score” or “locomotion score” or gait questionnaire” or “walking questionnaire” or locomotion questionnaire” or “gait test” or “walking test” or “locomotion test”) and (valid* or reliability) | 3 and 5 |
| Dialnet | (gait or walking or locomotion or ambulation or deambulation) and (scale or score or questionnaire) and (observational or visual) and (valid* or reliability) | 1 and 2 and 4 and 5 |
| (gait or walking or locomotion or ambulation or deambulation) and (measure* or test or analysis) and (observational or visual) and (valid* or reliability) | 1 and 2 and 4 and 5 |
| (gait or walking or locomotion or ambulation or deambulation) and (outcome or examination) and (observational or visual) and (valid* or reliability) | 1 and 2 and 4 and 5 |
| (gait or walking or locomotion or ambulation or deambulation) and (criter* or assess*) and (observational or visual) and (valid* or reliability) | 1 and 2 and 4 and 5 |
| (“gait scale” or “walking scale” or “locomotion scale” or “gait score” or “walking questionnaire” or “locomotion score”) and (valid* or reliability) | 3 and 5 |
| (“walking score” or “locomotion questionnaire” or “gait test” or “walking test” or “locomotion test” or “gait questionnaire”) and (valid* or reliability) | 3 and 5 |
| IME | gait and (scale or test or questionnaire or assessment or examination or analysis) and (valid* or reliability) | 1 and 2 and 5 |
| Enfispo | gait | 1 |

aFilter selected during the search in PubMed database.

**PRISMA Statement Checklist**

| **Section/topic** | **#** | **Checklist item** | **Reported on page #** |
| --- | --- | --- | --- |
| **TITLE** | | |  |
| Title | 1 | Identify the report as a systematic review, meta-analysis, or both. | 1 |
| **ABSTRACT** | | |  |
| Structured summary | 2 | Provide a structured summary including, as applicable: background; objectives; data sources; study eligibility criteria, participants, and interventions; study appraisal and synthesis methods; results; limitations; conclusions and implications of key findings; systematic review registration number. | 1 |
| **INTRODUCTION** | | |  |
| Rationale | 3 | Describe the rationale for the review in the context of what is already known. | 3-4 |
| Objectives | 4 | Provide an explicit statement of questions being addressed with reference to participants, interventions, comparisons, outcomes, and study design (PICOS). | 4 |
| **METHODS** | | |  |
| Protocol and registration | 5 | Indicate if a review protocol exists, if and where it can be accessed (e.g., Web address), and, if available, provide registration information including registration number. | 5 |
| Eligibility criteria | 6 | Specify study characteristics (e.g., PICOS, length of follow-up) and report characteristics (e.g., years considered, language, publication status) used as criteria for eligibility, giving rationale. | 5 |
| Information sources | 7 | Describe all information sources (e.g., databases with dates of coverage, contact with study authors to identify additional studies) in the search and date last searched. | 5 |
| Search | 8 | Present full electronic search strategy for at least one database, including any limits used, such that it could be repeated. | 5 |
| Study selection | 9 | State the process for selecting studies (i.e., screening, eligibility, included in systematic review, and, if applicable, included in the meta-analysis). | 6 |
| Data collection process | 10 | Describe method of data extraction from reports (e.g., piloted forms, independently, in duplicate) and any processes for obtaining and confirming data from investigators. | 6 |
| Data items | 11 | List and define all variables for which data were sought (e.g., PICOS, funding sources) and any assumptions and simplifications made. | 6-7 |
| Risk of bias in individual studies | 12 | Describe methods used for assessing risk of bias of individual studies (including specification of whether this was done at the study or outcome level), and how this information is to be used in any data synthesis. | 7 |
| Summary measures | 13 | State the principal summary measures (e.g., risk ratio, difference in means). | 6-8 |
| Synthesis of results | 14 | Describe the methods of handling data and combining results of studies, if done, including measures of consistency (e.g., I2) for each meta-analysis. | 6-7 |

| **Section/topic** | **#** | **Checklist item** | **Reported on page #** |
| --- | --- | --- | --- |
| Risk of bias across studies | 15 | Specify any assessment of risk of bias that may affect the cumulative evidence (e.g., publication bias, selective reporting within studies). | - |
| Additional analyses | 16 | Describe methods of additional analyses (e.g., sensitivity or subgroup analyses, meta-regression), if done, indicating which were pre-specified. | 7-8 |
| **RESULTS** | | |  |
| Study selection | 17 | Give numbers of studies screened, assessed for eligibility, and included in the review, with reasons for exclusions at each stage, ideally with a flow diagram. | 9-10 |
| Study characteristics | 18 | For each study, present characteristics for which data were extracted (e.g., study size, PICOS, follow-up period) and provide the citations. | 11-14 |
| Risk of bias within studies | 19 | Present data on risk of bias of each study and, if available, any outcome level assessment (see item 12). | 16 |
| Results of individual studies | 20 | For all outcomes considered (benefits or harms), present, for each study: (a) simple summary data for each intervention group (b) effect estimates and confidence intervals, ideally with a forest plot. | - |
| Synthesis of results | 21 | Present results of each meta-analysis done, including confidence intervals and measures of consistency. | - |
| Risk of bias across studies | 22 | Present results of any assessment of risk of bias across studies (see Item 15). | - |
| Additional analysis | 23 | Give results of additional analyses, if done (e.g., sensitivity or subgroup analyses, meta-regression [see Item 16]). | 16-17 |
| **DISCUSSION** | | |  |
| Summary of evidence | 24 | Summarize the main findings including the strength of evidence for each main outcome; consider their relevance to key groups (e.g., healthcare providers, users, and policy makers). | 18-23 |
| Limitations | 25 | Discuss limitations at study and outcome level (e.g., risk of bias), and at review-level (e.g., incomplete retrieval of identified research, reporting bias). | 23 |
| Conclusions | 26 | Provide a general interpretation of the results in the context of other evidence, and implications for future research. | 24 |
| **FUNDING** | | |  |
| Funding | 27 | Describe sources of funding for the systematic review and other support (e.g., supply of data); role of funders for the systematic review. | - |

*From:*  Moher D, Liberati A, Tetzlaff J, Altman DG, The PRISMA Group (2009). Preferred Reporting Items for Systematic Reviews and Meta-Analyses: The PRISMA Statement. PLoS Med 6(7): e1000097. doi:10.1371/journal.pmed100009
